# Supplementary material for: Implementation of charged microdroplet-based derivatization of bile acids on a cyclic ion mobility spectrometry-mass spectrometry platform
Source: Royal Society of Chemistry journal article supplement (doi:10.1039/d3ay01447a), 2023-01-01
Supplement: d3ay01447a1.pdf [file d3ay01447a1.pdf]

**Supporting Information for:**

**Implementation of Charged Microdroplet-Based Derivatization of Bile Acids on a Cyclic  
Ion Mobility Spectrometry-Mass Spectrometry Platform**

Olavs Rāciņš, Gabe Nagy \*

Department of Chemistry, University of Utah, 315 South 1400 East, Room 2020, Salt Lake City,  
Utah 84112, United States

**Corresponding author:** [gabe.nagy@utah.edu](mailto:gabe.nagy@utah.edu)

**Table of contents:**

|                                                 |       |
|-------------------------------------------------|-------|
| Experimental section                            | S2    |
| Experimental setup                              | S3    |
| MS and MS/MS spectra of cortisone & GT reaction | S4    |
| Reaction condition comparison table             | S5    |
| Inverted MS of the Microflow experiment         | S6    |
| cIMS-MS separations of derivatized bile acids   | S7-S9 |

## EXPERIMENTAL SECTION:

L-tyrosine hydrazide & N-boc-L-histidine hydrazide were purchased from Sigma Aldrich (St. Louis, MO, USA). All bile acids were purchased from AvantiLipids (Alabaster, AL, USA), except for  $\Delta^4$ -Dafachronic acid and  $\Delta^7$ -Dafachronic acid which were purchased from Cayman Chemicals (Ann Arbor, MI, USA), and 3-oxo allocholic acid which was purchased from Santa Cruz Biotechnology, Inc (Dallas, TX, USA), Girard's reagent T was purchased from TCI Chemicals (Portland, OR, USA). LC-MS grade solvents were purchased from Fischer Scientific (Pittsburgh, PA, USA). Stock solutions for were prepared in methanol and then diluted to final concentrations of 10  $\mu$ M (unless noted otherwise), respectively, in either 90/10 (v/v) water/methanol with 0.5% (v/v) formic acid or 80/20 (v/v) water/methanol with 0.5% (v/v) formic acid.

The commercial Waters cIMS-MS platform (Wilmslow, UK) has been previously described in detail elsewhere. Briefly, a quadrupole is located before the separation region and was used to filter out the desired  $m/z$  values to be subjected to cIMS-MS separations. The 1 m cIMS traveling wave separation region (the total separation of each separation pathlength corresponding to the number of cycles multiplied by 1 m) was operated at a pressure of 1.74 mbar in nitrogen. The time-of-flight MS was operated in 'V' mode and 50 to 1200  $m/z$  range. Signal averaging was performed for 2-10 minutes for each arrival time distribution and is listed in each of the respective figure captions. Data was acquired and processed with the MassLynx and Quartz software.

For the droplet-based experiments, a dual syringe setup with a T-in junction was used. Bile acid solutions were loaded in one syringe, while the derivatization reagent solutions were loaded into the other syringe. Both syringes were set to a flow rate of 5  $\mu$ L/min. The distance between the exit of the capillary and inlet of the cIMS-MS was  $\sim$ 10 mm (i.e., the charged microdroplet reaction region). The instrument was equipped with a high-flow ESI probe with an internal diameter of 125  $\mu$ m (Waters; P/N: 700011242). Optimization of operating parameters for a single experiment is described in the Table S1. For a schematic of our dual syringe setup, please see the main text of the Manuscript.

For the bulk reactions the product solutions were made according to the following procedure:

1. Micropipette 10  $\mu$ L of a 1mM bile acid solution in methanol into the microcentrifuge tube, add 45  $\mu$ L glacial acetic acid, add 10  $\mu$ L of a 1 mg/mL tagging reagent solution in methanol, add 35  $\mu$ L of methanol.
2. Vortex the microcentrifuge tube for 1 minute
3. Place the sample in heat block at 37  $^{\circ}$ C for 2 hours.
4. Dry the samples down.
5. Reconstitute sample with either 90/10 (v/v) water/methanol with 0.5% (v/v) formic acid or 80/20 (v/v) water/methanol with 0.5% (v/v) formic acid solution.

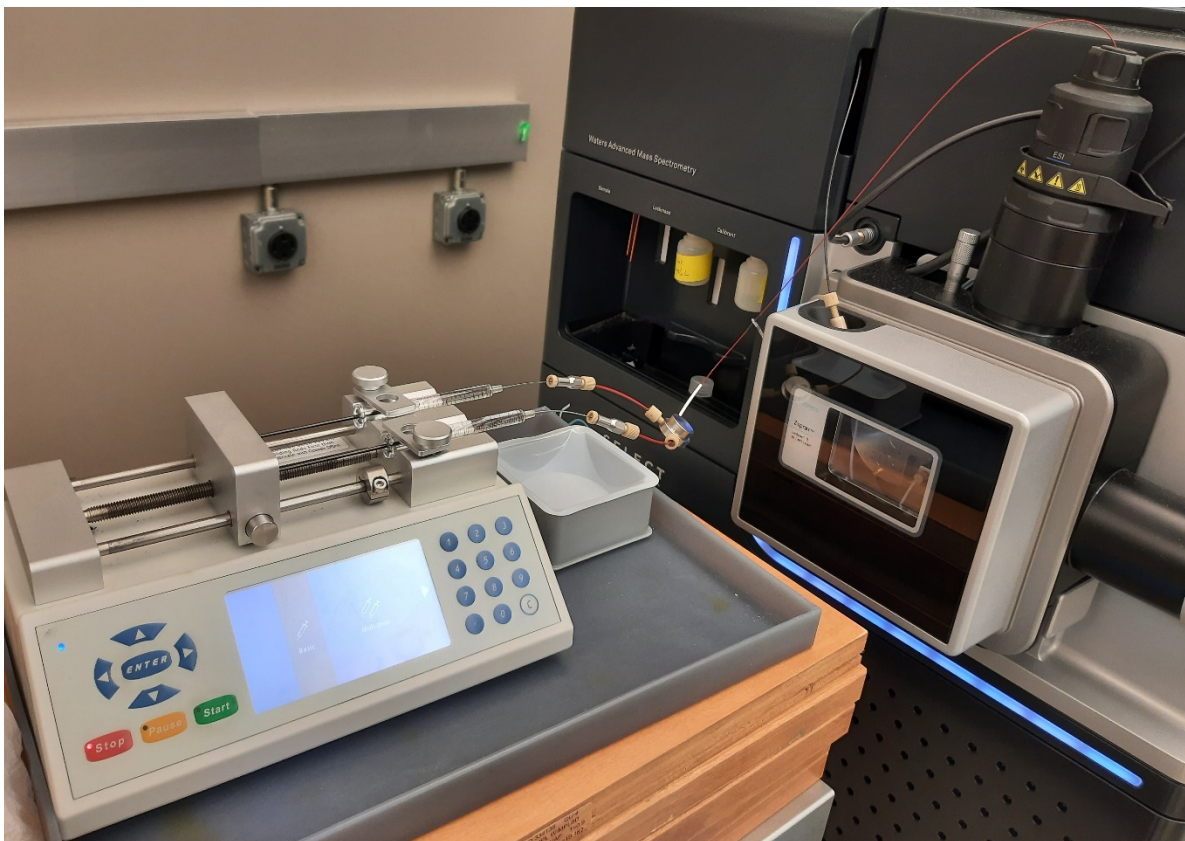

**Image S1.** The experimental setup of our dual syringe setup.

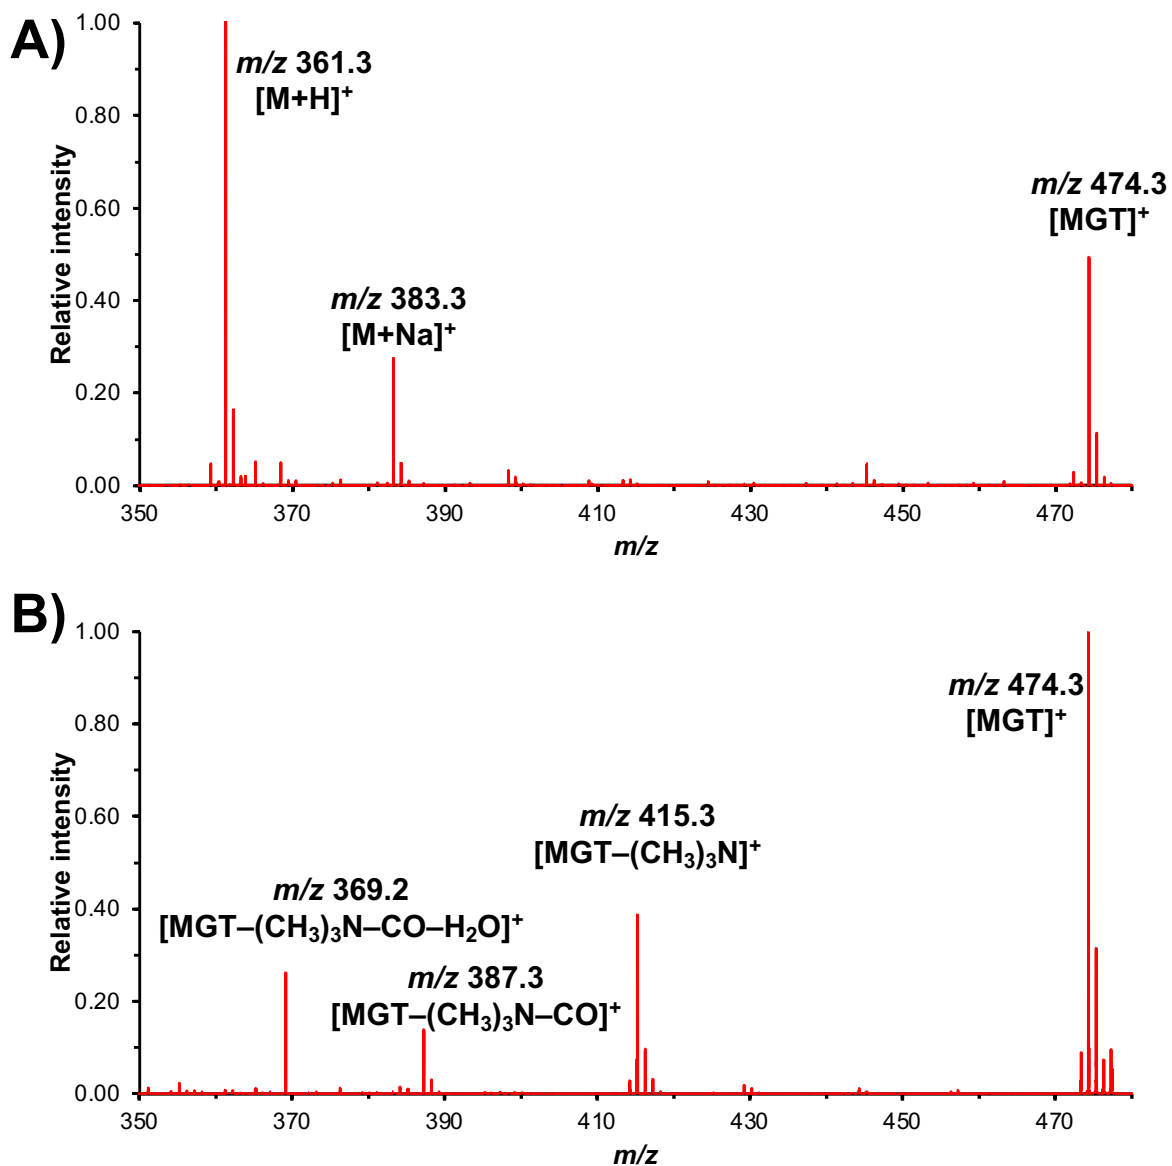

**Figure S1.** Mass spectra of the product of the reaction of cortisone and GT with signal averaging performed for 2 min (A). Tandem mass spectra highlighting fragment ions for the products of the reaction of cortisone & GT at the CID of 35 V with signal averaging performed for 5 min (B).

**Table S1.** Comparisons of varying droplet reaction conditions for the reaction of 3-OCA & various hydrazide tags.

| #   | Bile acid concentration | Derivatizing agent concentration         | Solvent composition                            | Relative intensity to highest intensity conditions |
|-----|-------------------------|------------------------------------------|------------------------------------------------|----------------------------------------------------|
| 1.  | 3-OCA (10 $\mu$ M)      | GT (10 $\mu$ M)                          | 90/10/0.5 (v/v)<br>MeOH/H <sub>2</sub> O/HCOOH | 0.7 %                                              |
| 2.  | 3-OCA (10 $\mu$ M)      | GT (10 $\mu$ M)                          | 80/20/0.5 (v/v)<br>MeOH/H <sub>2</sub> O/HCOOH | 100 %                                              |
| 3.  | 3-OCA (5 $\mu$ M)       | GT (10 $\mu$ M)                          | 80/20/0.5 (v/v)<br>MeOH/H <sub>2</sub> O/HCOOH | 1.8 %                                              |
| 4.  | 3-OCA (10 $\mu$ M)      | GT (5 $\mu$ M)                           | 80/20/0.5 (v/v)<br>MeOH/H <sub>2</sub> O/HCOOH | 1.8 %                                              |
| 5.  | 3-OCA (20 $\mu$ M)      | GT (5 $\mu$ M)                           | 80/20/0.5 (v/v)<br>MeOH/H <sub>2</sub> O/HCOOH | 3.4 %                                              |
| 6.  | 3-OCA (5 $\mu$ M)       | GT (20 $\mu$ M)                          | 80/20/0.5 (v/v)<br>MeOH/H <sub>2</sub> O/HCOOH | 11.5 %                                             |
| 7.  | 3-OCA (20 $\mu$ M)      | GT (10 $\mu$ M)                          | 80/20/0.5 (v/v)<br>MeOH/H <sub>2</sub> O/HCOOH | No product formation observed                      |
| 8.  | 3-OCA (10 $\mu$ M)      | GT (20 $\mu$ M)                          | 80/20/0.5 (v/v)<br>MeOH/H <sub>2</sub> O/HCOOH | 11.4 %                                             |
| 9.  | 3-OCA (10 $\mu$ M)      | GT (10 $\mu$ M)                          | 60/40/0.5 (v/v)<br>MeOH/H <sub>2</sub> O/HCOOH | 7.3 %                                              |
| 10. | 3-OCA (10 $\mu$ M)      | GT (10 $\mu$ M)                          | 50/50/0.5 (v/v)<br>MeOH/H <sub>2</sub> O/HCOOH | No product formation observed                      |
| 11. | 3-OCA (10 $\mu$ M)      | GT (10 $\mu$ M)                          | 80/20/2 (v/v)<br>MeOH/H <sub>2</sub> O/AcOH    | 5.2 %                                              |
| 12. | 3-OCA (10 $\mu$ M)      | GT (10 $\mu$ M)                          | 80/20/0.1 (v/v)<br>MeOH/H <sub>2</sub> O/TFA   | 35.5 %                                             |
| 13. | 3-OCA (10 $\mu$ M)      | GT (10 $\mu$ M)                          | 80/20/0.5 (v/v)<br>MeCN/H <sub>2</sub> O/HCOOH | No product formation observed                      |
| 14. | 3-OCA (10 $\mu$ M)      | N-boc-L-histidine hydrazide (10 $\mu$ M) | 80/20/0.5 (v/v)<br>MeOH/H <sub>2</sub> O/HCOOH | 8.9 %                                              |
| 15. | 3-OCA (10 $\mu$ M)      | N-boc-L-histidine hydrazide (10 $\mu$ M) | 90/10/0.5 (v/v)<br>MeOH/H <sub>2</sub> O/HCOOH | 100 %                                              |
| 16. | 3-OCA (10 $\mu$ M)      | L-tyrosine hydrazide (10 $\mu$ M)        | 80/20/0.5 (v/v)<br>MeOH/H <sub>2</sub> O/HCOOH | 27.7 %                                             |
| 17. | 3-OCA (10 $\mu$ M)      | L-tyrosine hydrazide (10 $\mu$ M)        | 90/10/0.5 (v/v)<br>MeOH/H <sub>2</sub> O/HCOOH | 100 %                                              |

We would like to note that comparisons with methanol/formic acid 100/0.5 (v/v) solvent mixture were performed with bile acid substrates other than 3-OCA and yielded decrease in signal intensity compared to 90/10/0.5 (v/v) MeOH/H<sub>2</sub>O/HCOOH solvent mixture.

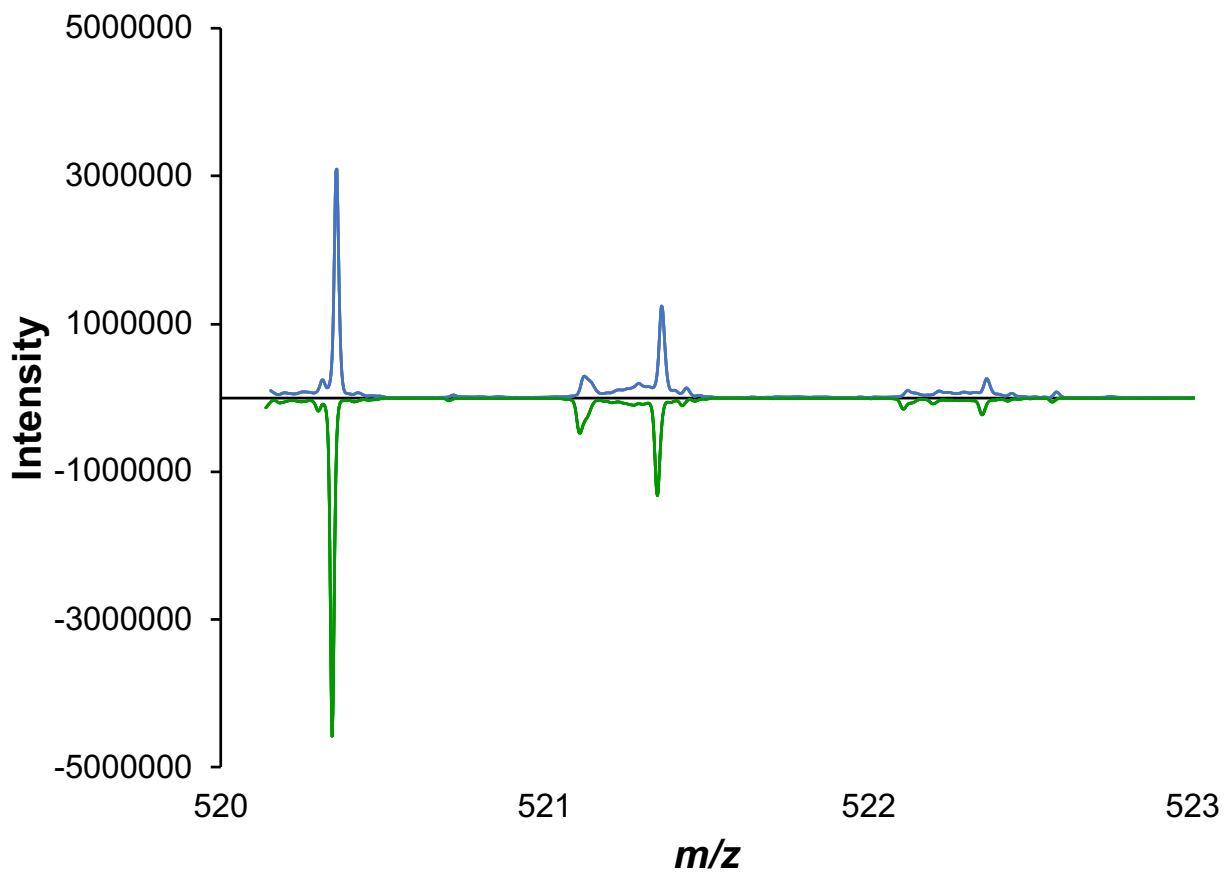

**Figure S2.** Inverted mass spectra of the product of the reaction of 3-OCA and GT with microflow of 2  $\mu\text{L}/\text{min}$  preceding direct infusion (blue trace) and direct infused sample (green trace). Signal averaging performed for three minutes for each. PEEK tube used: "TRAJAN" 1302004006-10F, 1/16"OD X 0.004" ID. Length used  $\sim 70$  cm. The length of PEEK tubing used was identical to that used in the direct infusion droplet chemistry experiments.

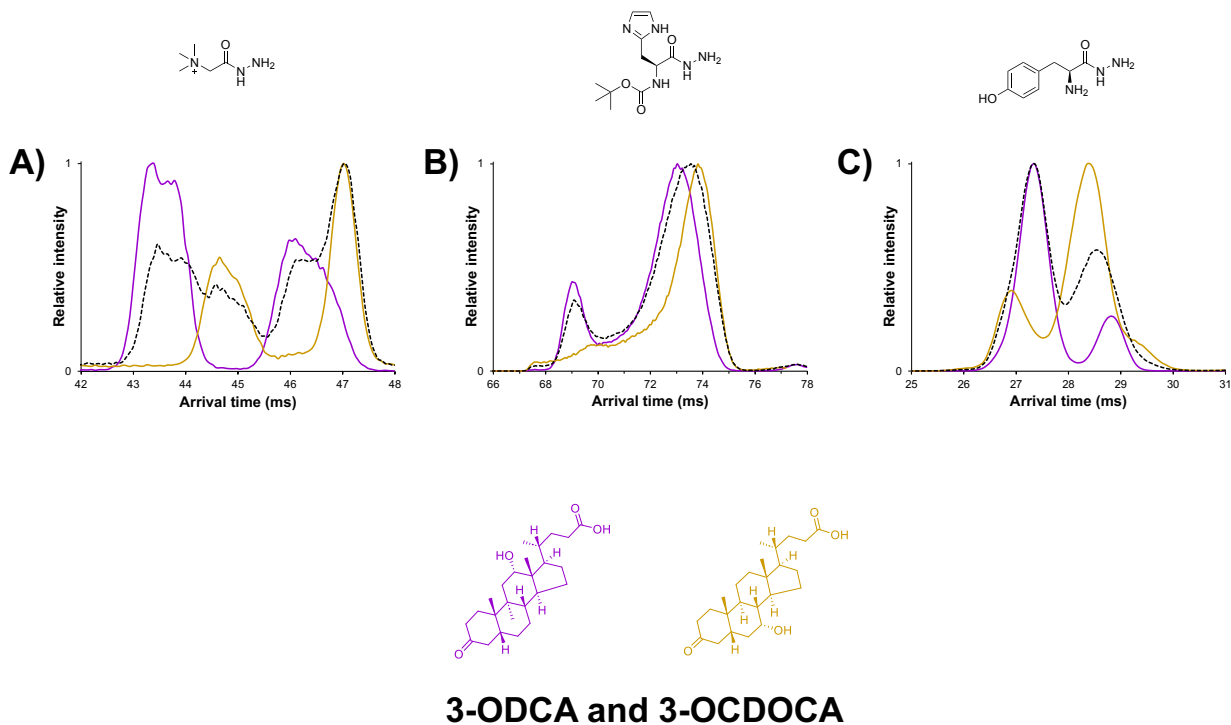

**Figure S3.** cIMS-MS separation (5 m) of the products of the 3-ODCA and 3-OCDOCA isomers with GT reaction as their  $[M]^+$  ions at TW conditions of 480 m/s and 28 V with signal averaging performed for 5 min (A). cIMS-MS separation (2 m) of the products of the 3-ODCA and 3-OCDOCA isomers with L-tyrosine hydrazone reaction as its  $[M + H]^+$  adducts at TW conditions of 480 m/s and 28 V with signal averaging performed for 5 min (B). cIMS-MS separation (5 m) of the products of the 3-ODCA and 3-OCDOCA isomers with N-boc-L-histidine hydrazone as its  $[M + H]^+$  adducts under TW conditions of 550 m/s and 30 V with signal averaging performed for 3 min (C). The dotted black trace represents the isomeric mixture.

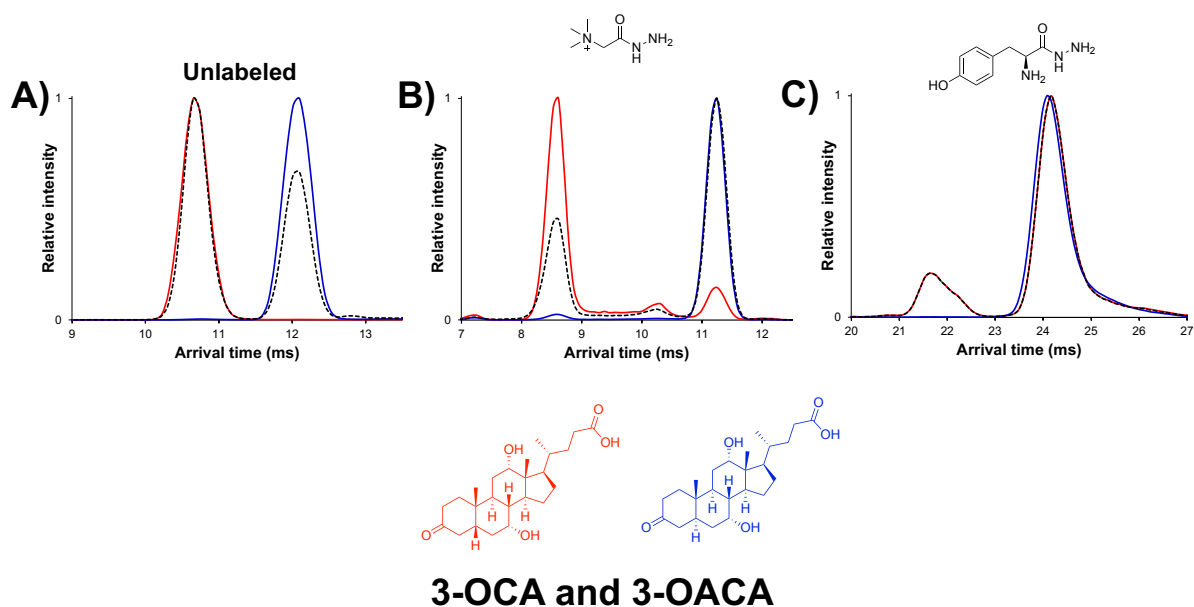

**Figure S4.** cIMS-MS separation of 3-OCA and 3-OACA as their  $[M + Na]^+$  adduct at 1 m at TW conditions of 525 m/s and 25 V with signal averaging performed for 2 min (A). cIMS-MS separation (1 m) of the products of the 3-OCA and 3-OACA isomers with GT as their  $[M]^+$  ions TW conditions of 500 m/s and 32 V with signal averaging performed for 4 min (B). cIMS-MS separation (2 m) of the products of the 3-OCA and 3-OACA isomers with L-tyrosine hydrazide as its  $[M + H]^+$  adducts under TW conditions of 480 m/s and 28 V with signal averaging performed for 4 min (C). The dotted black trace represents the isomeric mixture.



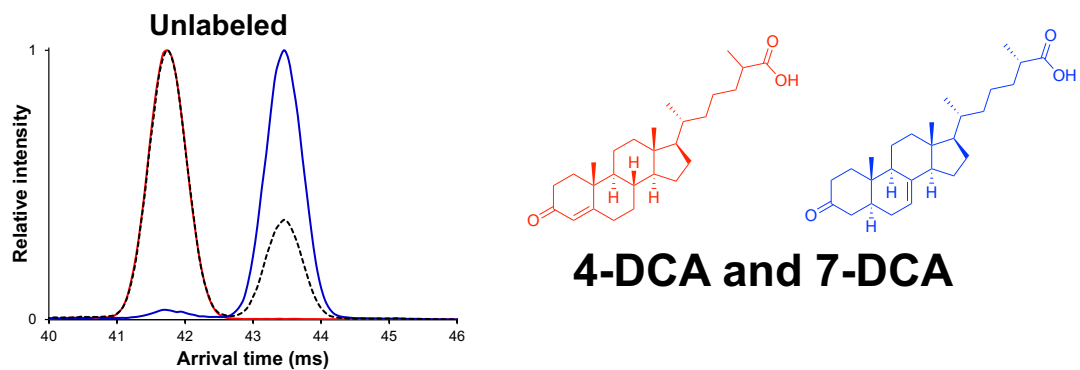

**Figure S5.** cIMS-MS separations of 4-DCA & 7-DCA isomers as their  $[M + Na]^+$  adducts at 5 m at TW conditions of 450 m/s and 27 V with signal averaging performed for 2 min. The dotted black trace represents the isomeric mixture.
